# Supplementary figures and images for: Human Neutrophil Defensins Disrupt Liver Interendothelial Junctions and Aggravate Sepsis
Source: Hindawi journal article supplement (doi:10.1155/2022/7659282), 2022-07-29

**Supplementary Figure 1**

**(a)**

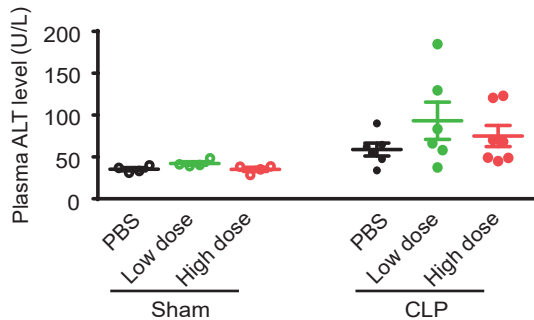

**(b)**

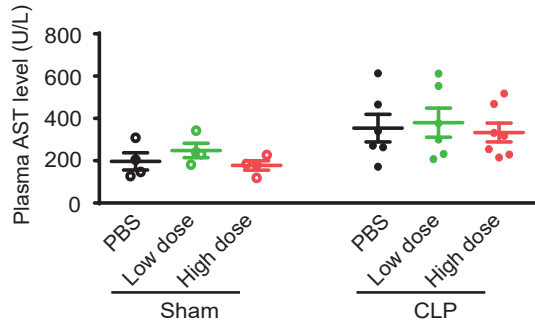

Supplement: f1 [file 7659282.f1.zip]

Supplementary Figure 2

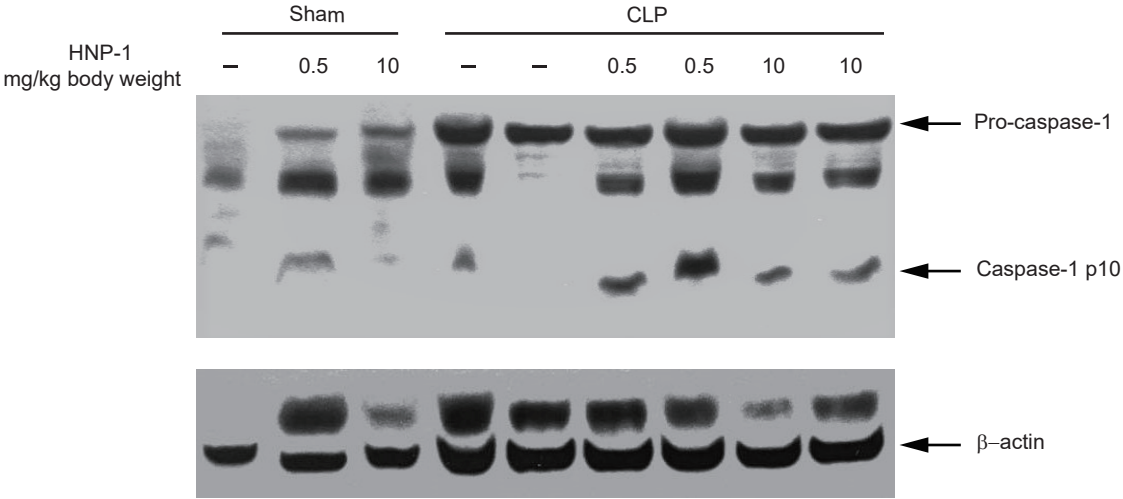

Supplement: f1 [file 7659282.f1.zip]
